# Supplementary material
Source: publisher figshare collection journal article supplement (https://acs.figshare.com/ndownloader/files/24464800)
Supplement: Supplementary file 1 [file 24464800]

## Supporting Information

### **Designer Hydrogel with Intelligently Switchable Stem-Cell-Contact for Incubating Cartilaginous Micro-tissues**

Zijie Xiahou <sup>†,1</sup>, Yunlang She <sup>‡,1</sup>, Jiahui Zhang <sup>†</sup>, Yechi Qin <sup>†</sup>, Guifei Li <sup>†</sup>, Lili Zhang <sup>†</sup>, Haowei Fang <sup>†</sup>, Kunxi Zhang <sup>†,\*</sup>, Chang Chen <sup>‡,\*</sup>, Jingbo Yin <sup>†,\*</sup>

<sup>†</sup>Department of Polymer Materials, School of Materials Science and Engineering, Shanghai University, Shanghai 200444, PR China.

<sup>‡</sup>Department of Thoracic Surgery, Shanghai Pulmonary Hospital, Tongji University School of Medicine, Shanghai, 200433, PR China.

\* Corresponding authors:

K. Zhang ([zhangkunxi@shu.edu.cn](mailto:zhangkunxi@shu.edu.cn));

C. Chang ([changchenc@tongji.edu.cn](mailto:changchenc@tongji.edu.cn));

J. Yin ([jbyin@oa.shu.edu.cn](mailto:jbyin@oa.shu.edu.cn)).

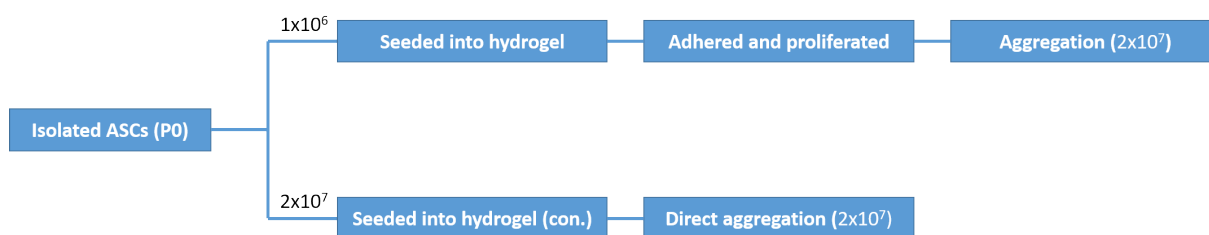

**Figure S1.** Scheme of induction duration and seeding cell density.

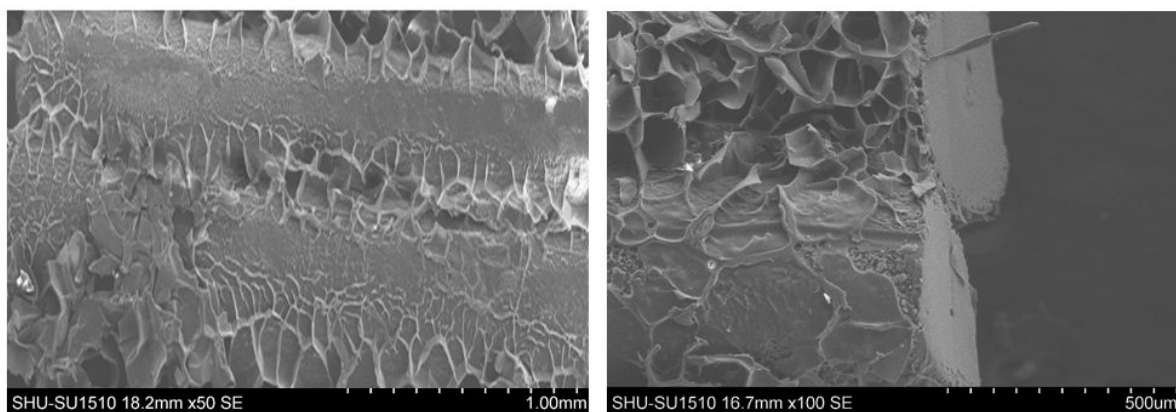

**Figure S2.** SEM images of PLA rods inlaid in hydrogel matrix.

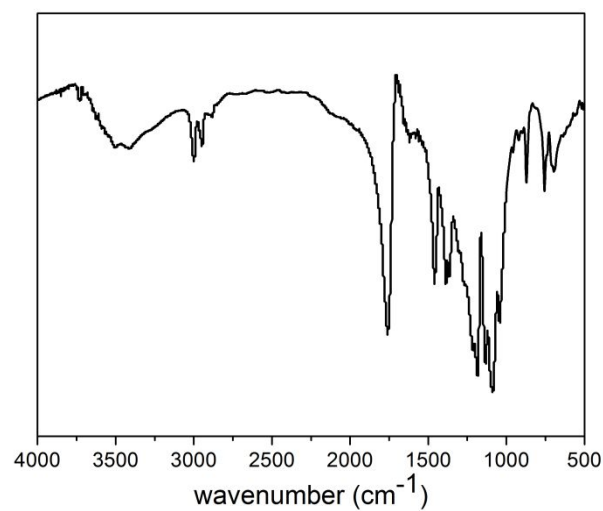

**Figure S3.** FT-IR of the molecule collected from reducing solution.

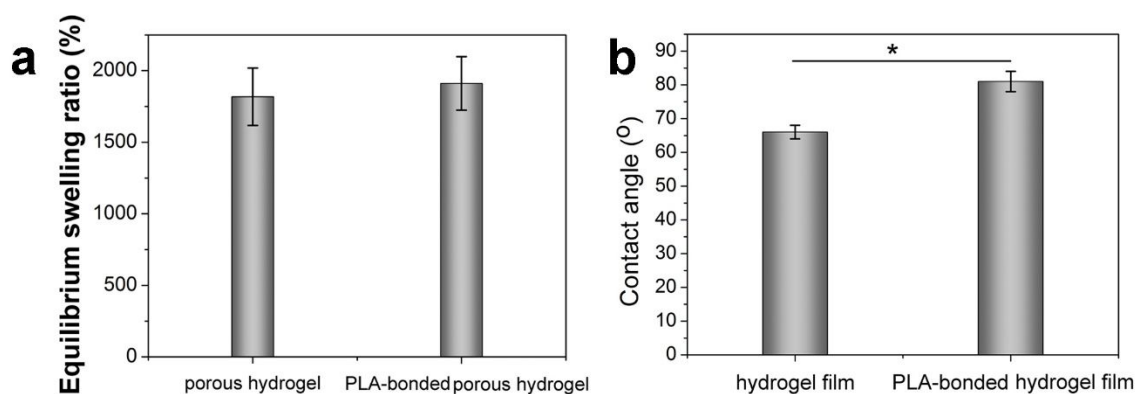

**Figure S4.** Equilibrium swelling ratio of poly (L-glutamic acid)/ADH porous hydrogel and PLA-bonded poly (L-glutamic acid)/ADH porous hydrogel (a). And their equilibrium swelling ratio showed no significant difference; Contact angle of poly (L-glutamic acid)/ADH hydrogel film and PLA-bonded poly (L-glutamic acid)/ADH hydrogel film (b). Poly (L-glutamic acid)/ADH hydrogel film showed the contact angle of 66°, while PLA-bonded poly (L-glutamic acid) /ADH hydrogel film was significantly more hydrophobic, showing the contact angle of 81°. \* $p < 0.05$ .

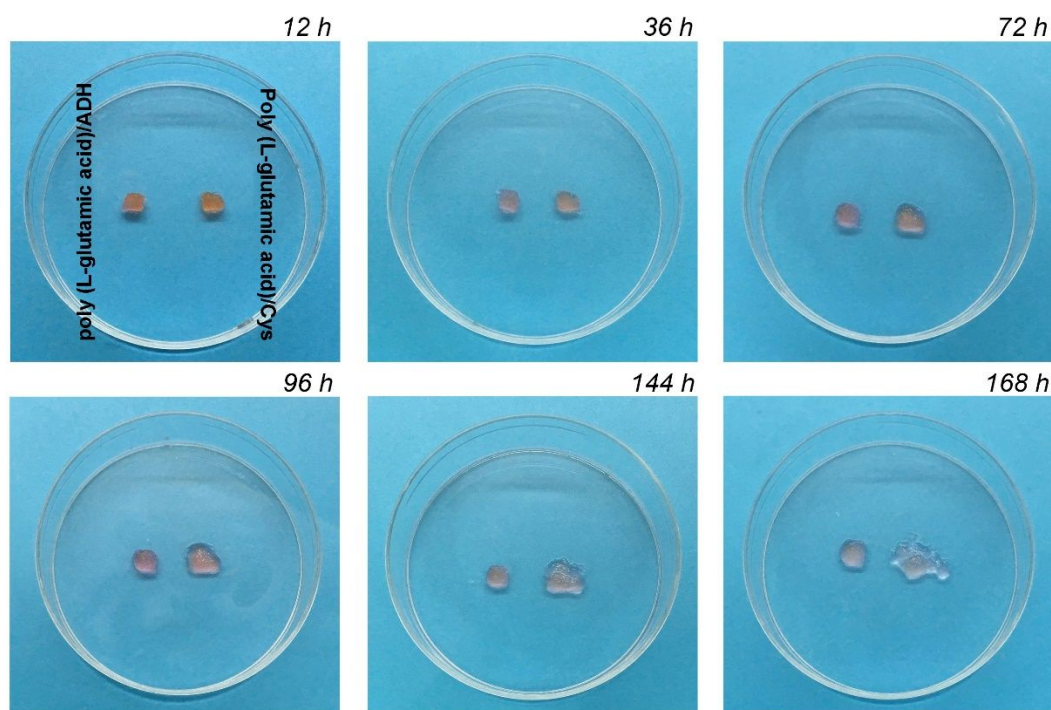

**Figure S5.** Poly (L-glutamic acid)/Cys porous hydrogel degraded significantly along with ASCs in vitro culture. However, poly (L-glutamic acid)/ADH porous hydrogel containing ASCs that cultured in the same dish was stable.

**Table S1.** Molecular weight and Polydispersity of PLA

|         | Mn                |                        | PDI               |                        |
|---------|-------------------|------------------------|-------------------|------------------------|
|         | Before aminolysis | Detached from hydrogel | Before aminolysis | Detached from hydrogel |
| PLA(i)  | 88046             | 21335                  | 1.50              | 2.39                   |
| PLA(ii) | 172684            | 72578                  | 1.57              | 2.67                   |
